# Supplementary material
Source: HighWire-hosted journal article supplement (https://erj.ersjournals.com/content/55/3/1901633)
Supplement: inline-supplementary-material-1 [file inline-supplementary-material-1.pdf]

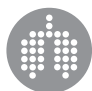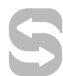

SHAREABLE PDF

# Clinical utility of fractional exhaled nitric oxide in severe asthma management

Andrew Menzies-Gow<sup>1</sup>, Adel H. Mansur <sup>2,3</sup> and Christopher E. Brightling<sup>4</sup>

**Affiliations:** <sup>1</sup>Dept of Respiratory Medicine, Royal Brompton Hospital, London, UK. <sup>2</sup>Dept of Respiratory Medicine, Heartlands Hospital, University Hospitals Birmingham NHS Foundation Trust, Birmingham, UK. <sup>3</sup>Institute of Inflammation and Ageing, University of Birmingham, Birmingham, UK. <sup>4</sup>Institute for Lung Health, NIHR Leicester Biomedical Research Centre, Dept of Respiratory Sciences, University of Leicester, Leicester, UK.

**Correspondence:** Andrew Menzies-Gow, Dept of Respiratory Medicine, Royal Brompton Hospital, Sydney Street, London SW3 6NP, UK. E-mail: a.menzies-gow@rbht.nhs.uk

 @ERSpublications

**The optimisation of  $F_{eNO}$  testing methods in a variety of clinical settings, as a non-invasive, readily available, and affordable technology, could play an important role in advancing effective asthma control** <http://bit.ly/2FN6P3j>

**Cite this article as:** Menzies-Gow A, Mansur AH, Brightling CE. Clinical utility of fractional exhaled nitric oxide in severe asthma management. *Eur Respir J* 2020; 55: 1901633 [<https://doi.org/10.1183/13993003.01633-2019>].

This single-page version can be shared freely online.

**ABSTRACT** Asthma is a chronic inflammatory disease of the airways, affecting over 350 million people worldwide and placing a significant burden on healthcare providers and wider society. Approximately 5–10% of asthma patients are diagnosed with severe asthma and typically are associated with increased risk of hospitalisation from exacerbations, increased morbidity, mortality and higher asthma-associated healthcare costs. Nitric oxide (NO) is an important regulator of immune responses and is a product of inflammation in the airways that is over-produced in asthma. Fractional exhaled NO ( $F_{eNO}$ ) is predominantly used as a predictor of response to inhaled corticosteroids (ICSs), to monitor adherence and as a diagnostic tool in ICS-naïve patients. In the UK, the National Institute for Health and Care Excellence (NICE) guidelines recommend the use of  $F_{eNO}$  for the initial diagnosis of patients with suspected asthma. In the USA, American Thoracic Society (ATS) guidelines recommend  $F_{eNO}$  as part of the initial diagnosis of asthma and for monitoring of airway inflammation.  $F_{eNO}$  has also been shown to be a predictive factor for asthma exacerbations, with higher levels being associated with a greater number of exacerbations. In addition, higher levels of  $F_{eNO}$  have been shown to be associated with a decline in lung function.  $F_{eNO}$  testing is a cost-effective procedure and has been shown to improve patient management when combined with standard assessment methods. Recent evidence suggests that  $F_{eNO}$  may also be useful as a surrogate biomarker for the assessment and management of severe asthma and to predict responsiveness to some biological therapies.
